# Supplementary material for: Translating new evidence into clinical practice: a quasi-experimental controlled before–after study evaluating the effect of a novel outreach mentoring approach on knowledge, attitudes and confidence of health workers providing HIV and infant feeding counselling in South Africa
Source: HighWire-hosted journal article supplement (doi:10.1136/bmjopen-2019-034770), 2020-10-01
Supplement: bmjopen-2019-034770supp002_data_supplement.pdf [file bmjopen-2019-034770supp002_data_supplement.pdf]

**Supplementary Figure 1: Prior training reported by participants at baseline (intervention versus comparison groups)**

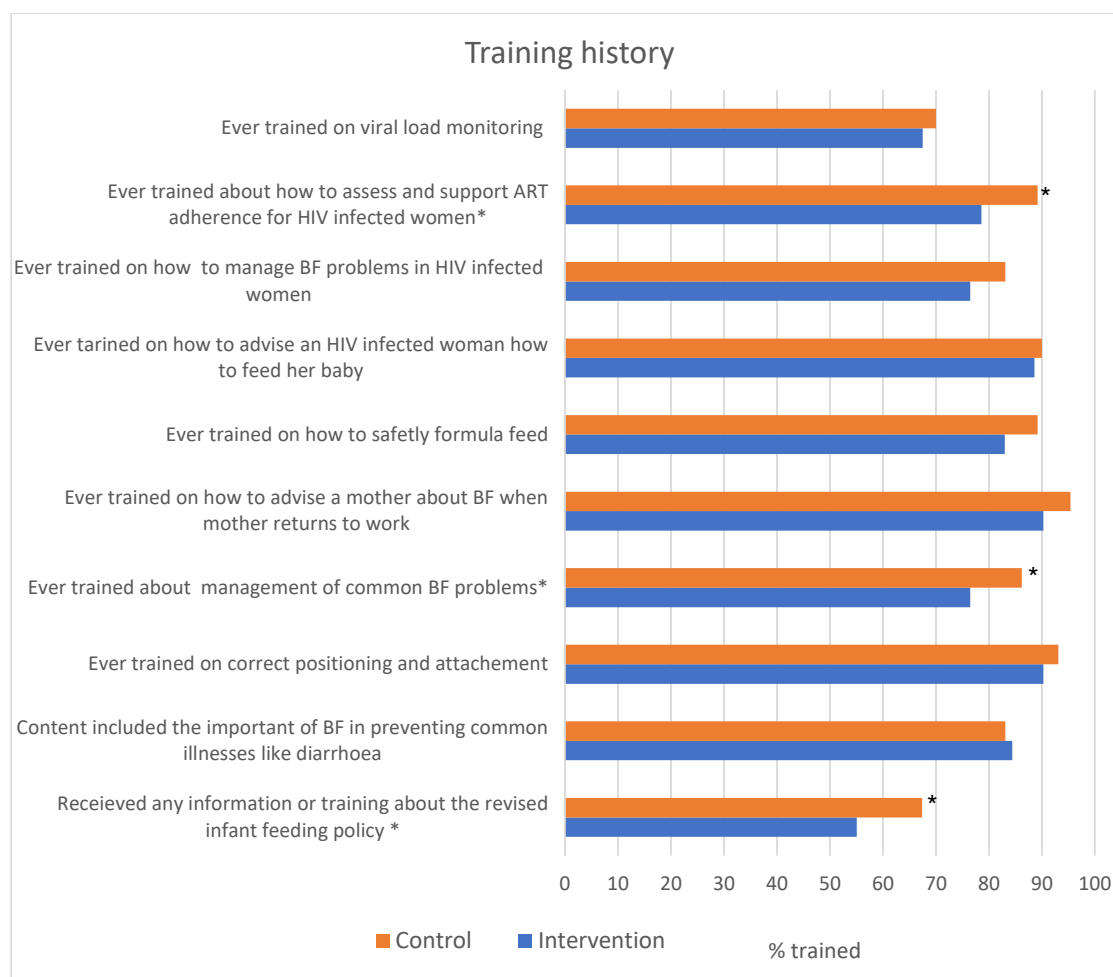

\* $p < 0.05$

Abbreviations: ART= antiretroviral therapy; BF= breastfeeding
