# Supplementary material for: Translating new evidence into clinical practice: a quasi-experimental controlled before–after study evaluating the effect of a novel outreach mentoring approach on knowledge, attitudes and confidence of health workers providing HIV and infant feeding counselling in South Africa
Source: HighWire-hosted journal article supplement (doi:10.1136/bmjopen-2019-034770), 2020-10-01
Supplement: bmjopen-2019-034770supp003_data_supplement.pdf [file bmjopen-2019-034770supp003_data_supplement.pdf]

**Supplementary Table 1: Attitude scores of health workers at baseline and follow-up**

| Attitude statements                                                                                                                                                                         | Number (%) who agreed or strongly agreed with the statement at baseline |                    |           | Number (%) who agreed or strongly agreed with the statement at follow-up |                    |          |
|---------------------------------------------------------------------------------------------------------------------------------------------------------------------------------------------|-------------------------------------------------------------------------|--------------------|-----------|--------------------------------------------------------------------------|--------------------|----------|
|                                                                                                                                                                                             | Intervention (n=289)                                                    | Comparison (n=131) | P-value * | Intervention (n=252)                                                     | Comparison (n=114) | p-value* |
| <i>Significant improvements between intervention and comparison groups at follow-up</i>                                                                                                     |                                                                         |                    |           |                                                                          |                    |          |
| There have been so many changes to the infant feeding guidelines and breastfeeding guidelines however I am NOT confused about what to tell mothers who are HIV-infected about breastfeeding | 155 (53.6)                                                              | 74 (56.9)          | 0.59      | 175 (69.4)                                                               | 65 (57.0)          | 0.02     |
| For an HIV-exposed infant any breastfeeding is better than no breastfeeding at all, as long as the mother is virally suppressed and on antiretroviral therapy                               | 189 (65.4)                                                              | 79 (61.2)          | 0.31      | 196 (77.8)                                                               | 74 (64.9)          | 0.01     |
| When a baby cries all the time it is NOT usually because the baby is hungry and needs more food than just breastmilk                                                                        | 260 (90.0)                                                              | 107 (83.0)         | 0.02      | 230 (91.3)                                                               | 91 (79.8)          | <0.01    |
| Exclusive breastfeeding in the first 6 months of life is the best choice for all mothers and babies in South Africa                                                                         | 256 (88.6)                                                              | 114 (88.4)         | 0.65      | 239 (94.8)                                                               | 98 (86.0)          | <0.01    |
| The benefits of breastfeeding for protecting children from illness such as diarrhoea and pneumonia outweighs the risk of acquiring HIV if the mother is on antiretroviral treatment         | 224 (77.5)                                                              | 93 (72.1)          | 0.15      | 218 (86.5)                                                               | 87 (76.3)          | 0.02     |
| I feel that an HIV-infected mother who has not disclosed to her partner is NOT at high risk of non-adherence to ART and should NOT stop breastfeeding as soon as possible                   | 128 (44.3)                                                              | 51 (39.5)          | 0.30      | 137 (54.4)                                                               | 46 (40.4)          | 0.01     |
| I should support all mothers, regardless of HIV status, to continue breastfeeding until 2 years, as long as HIV-infected women are virally suppressed                                       | 237 (82.0)                                                              | 101 (78.3)         | 0.24      | 237 (94.1)                                                               | 87 (76.3)          | <0.01    |
| I should NOT advise an HIV-positive virally suppressed mother who has cracked and bleeding nipples to temporarily stop breastfeeding                                                        | 80 (27.7)                                                               | 40 (31.3)          | 0.55      | 97 (38.5)                                                                | 24 (21.1)          | <0.01    |
| Formula feeding is NOT the best choice for mothers living in good socio-economic circumstances who are going back to work                                                                   | 202 (70.0)                                                              | 95 (74.2)          | 0.58      | 198 (78.6)                                                               | 74 (64.9)          | <0.01    |
| It is safer for HIV-positive mothers to breastfeed than to formula feed                                                                                                                     | 231 (79.9)                                                              | 89 (69.5)          | 0.63      | 226 (89.7)                                                               | 85 (74.6)          | <0.01    |
| It is NOT very difficult for mothers to express breastmilk while they are at work or school                                                                                                 | 164 (53.0)                                                              | 57 (44.5)          | 0.01      | 168 (67.1)                                                               | 51 (44.7)          | <0.01    |
| If an HIV-positive mother can afford to buy formula it is NOT better for her to formula feed her baby                                                                                       | 170 (58.8)                                                              | 83 (64.9)          | 0.38      | 185 (73.4)                                                               | 68 (59.7)          | <0.01    |
| Promoting breastfeeding for two years for HIV-exposed infants is NOT a risk because                                                                                                         | 197 (68.2)                                                              | 85 (66.4)          | 0.51      | 210 (83.3)                                                               | 79 (69.3)          | <0.01    |

|                                                                                                                                                                                                         |                                  |                                  |                    |                                  |                                  |                        |
|---------------------------------------------------------------------------------------------------------------------------------------------------------------------------------------------------------|----------------------------------|----------------------------------|--------------------|----------------------------------|----------------------------------|------------------------|
| mothers will be able to maintain good ART adherence for that long                                                                                                                                       |                                  |                                  |                    |                                  |                                  |                        |
| <b>Low levels of knowledge (&lt;80%) at baseline in both groups - no significant differences between intervention and comparison groups at follow-up [concept that this relates to]</b>                 |                                  |                                  |                    |                                  |                                  |                        |
| For an HIV-positive mother on antiretroviral treatment and virally suppressed mixed feeding is better than not breastfeeding at all                                                                     | 39 (13.5)                        | 15 (11.7)                        | 0.56               | 57 (22.6)                        | 16 (14.0)                        | 0.06                   |
| In our community working mothers can successfully maintain exclusive breast feeding while going to work                                                                                                 | 219 (75.8)                       | 89 (69.5)                        | 0.09               | 208 (82.5)                       | 92 (80.7)                        | 0.67                   |
| There are exceptional circumstances where an HIV-positive mother would be advised not to breastfeed, such as failure of 2 <sup>nd</sup> or 3 <sup>rd</sup> line ART treatment, but these are not common | 225 (77.9)                       | 93 (72.7)                        | 0.13               | 201 (79.7)                       | 87 (76.3)                        | 0.46                   |
| <b>High levels of knowledge (≥80%) at baseline in both groups – no significant differences between intervention and comparison groups at follow-up</b>                                                  |                                  |                                  |                    |                                  |                                  |                        |
| HIV-exposed babies who are PCR negative must NOT stop breastfeeding as soon as possible                                                                                                                 | 238 (82.4)                       | 104 (81.3)                       | 0.47               | 221 (87.7)                       | 95 (83.3)                        | 0.26                   |
| Exclusive breastfeeding for six months is an achievable goal for the majority of mothers                                                                                                                | 249 (86.2)                       | 105 (82.0)                       | 0.11               | 227 (90.1)                       | 96 (84.1)                        | 0.11                   |
| An HIV-positive mother who is on ART and not virally suppressed and is mixed feeding is putting her child at risk of acquiring HIV                                                                      | 256 (88.6)                       | 109 (85.2)                       | 0.13               | 219 (86.9)                       | 97 (85.1)                        | 0.64                   |
| In South Africa it is possible to improve exclusive breastfeeding rates                                                                                                                                 | 244 (84.7)                       | 108 (84.4)                       | 0.61               | 230 (91.3)                       | 97 (85.1)                        | 0.08                   |
| Formula feeding is NOT more convenient for a mother than breastfeeding                                                                                                                                  | 253 (87.5)                       | 109 (85.2)                       | 0.23               | 211 (83.7)                       | 100(87.7)                        | 0.32                   |
| <b><u>Number (%) participants whose attitude was to at least agree (Attitude score ≥84)*</u></b>                                                                                                        | <b><u>71 (24.6)</u></b>          | <b><u>23 (17.9)</u></b>          | <b><u>0.12</u></b> | <b><u>123 (49.2)</u></b>         | <b><u>27 (24.1)</u></b>          | <b><u>&lt;0.01</u></b> |
| <b><u>Mean attitude score out of 105 (95% CI)</u></b>                                                                                                                                                   | <b><u>76.9 (75.9 – 77.9)</u></b> | <b><u>75.0 (73.0 – 77.0)</u></b> | <b><u>0.07</u></b> | <b><u>82.7 (81.6 – 83.8)</u></b> | <b><u>76.8 (75.0 – 78.5)</u></b> | <b><u>&lt;0.01</u></b> |

\*84 was the minimum score obtainable if a participant at least agreed with all statements

**Supplementary Table 2: Confidence statements of health workers at baseline and follow-up**

| Confidence statements                                                                                                                                                                          | Number (%) who felt confident or very confident at baseline |                    |         | Number (%) who felt confident or very confident at follow-up |                    |         |
|------------------------------------------------------------------------------------------------------------------------------------------------------------------------------------------------|-------------------------------------------------------------|--------------------|---------|--------------------------------------------------------------|--------------------|---------|
|                                                                                                                                                                                                | Intervention (n=289)                                        | Comparison (n=131) | p-value | Intervention (n=252)                                         | Comparison (n=114) | p-value |
| <b><i>Significant improvements between intervention and comparison groups at follow-up</i></b>                                                                                                 |                                                             |                    |         |                                                              |                    |         |
| How confident do you feel about counselling an HIV-positive pregnant woman about how she will feed her baby                                                                                    | 265 (91.7)                                                  | 116 (88.6)         | 0.30    | 240 (95.2)                                                   | 100 (87.7)         | 0.01    |
| How confident do you feel about advising an HIV-positive mother about how to continue to breastfeed her baby when she returns to work or school                                                | 258 (89.3)                                                  | 117 (89.3)         | 0.99    | 242 (96.0)                                                   | 101 (88.6)         | <0.01   |
| How confident do you feel about advising an HIV-infected mother to continue breastfeeding for two years                                                                                        | 216 (74.7)                                                  | 105 (80.2)         | 0.23    | 236 (93.6)                                                   | 93 (81.6)          | <0.01   |
| How confident do you feel about assessing ART compliance in an HIV-positive mother                                                                                                             | 240 (83.1)                                                  | 111 (84.7)         | 0.67    | 230 (91.3)                                                   | 94 (82.5)          | 0.02    |
| How confident do you feel about advising an HIV-infected mother who is exclusively breastfeeding and has cracked nipples with bloody milk about how to feed her baby                           | 196 (67.8)                                                  | 84 (64.1)          | 0.45    | 201 (79.8)                                                   | 80 (70.2)          | 0.04    |
| <b><i>Low levels of knowledge (&lt;80%) at baseline in both groups - no significant differences between intervention and comparison groups at follow-up [concept that this relates to]</i></b> |                                                             |                    |         |                                                              |                    |         |
| How confident do you feel about advising an HIV-infected mother about how to stop breastfeeding                                                                                                | 214 (74.1)                                                  | 89 (67.9)          | 0.20    | 188 (74.6)                                                   | 86 (75.4)          | 0.87    |
| How confident do you feel about identifying when an HIV-positive mother is not adhering to her ART treatment                                                                                   | 224 (77.5)                                                  | 104 (79.4)         | 0.67    | 218 (86.5)                                                   | 90 (79.0)          | 0.07    |
| How confident do you feel about reassuring a mother living with HIV who is virally suppressed that a shorter duration of breastfeeding is better than never initiating breastfeeding           | 227 (78.5)                                                  | 103 (78.6)         | 0.99    | 215 (85.3)                                                   | 96 (84.2)          | 0.78    |
| How confident do you feel about assisting a mother with HIV to safely formula feed her baby                                                                                                    | 212 (73.4)                                                  | 102 (77.9)         | 0.33    | 191 (75.8)                                                   | 95 (83.3)          | 0.11    |
| How confident do you feel about using the guidelines for safe replacement feeding when you counsel a mother who is not adherent to ART and has a viral load above 1000 copies/ml               | 191 (66.1)                                                  | 99 (75.6)          | 0.05    | 185 (73.4)                                                   | 75 (65.8)          | 0.14    |
| How confident do you feel about advising an HIV-infected mother who is exclusively breastfeeding and has defaulted from her ART about how to feed her baby                                     | 205 (70.9)                                                  | 97 (74.1)          | 0.51    | 189 (75.0)                                                   | 80 (70.2)          | 0.33    |
| How confident do you feel about managing poor ART compliance in an HIV-infected breastfeeding mother                                                                                           | 215 (74.4)                                                  | 104 (79.4)         | 0.27    | 209 (82.9)                                                   | 89 (78.1)          | 0.27    |

|                                                                                                                                                          |                                |                                |                    |                                |                                |                    |
|----------------------------------------------------------------------------------------------------------------------------------------------------------|--------------------------------|--------------------------------|--------------------|--------------------------------|--------------------------------|--------------------|
| A mother is not adherent to ART and her last viral load is 1000 copies per ml. How confident do you feel about counselling her about feeding her infant? | 199 (68.9)                     | 98 (74.8)                      | 0.21               | 198 (78.6)                     | 80 (70.2)                      | 0.08               |
| <b>High levels of knowledge (≥80%) at baseline in both groups – no significant differences between intervention and comparison groups at follow-up</b>   |                                |                                |                    |                                |                                |                    |
| How confident do you feel about giving information about the risks and benefits of breastfeeding to an HIV-infected mother                               | 268 (92.7)                     | 120 (91.6)                     | 0.67               | 238 (94.4)                     | 102 (89.5)                     | 0.09               |
| How confident do you feel about assessing whether there is good positioning and attachment during breastfeeding                                          | 263 (91.0)                     | 125 (95.4)                     | 0.11               | 243(96.4)                      | 107 (93.9)                     | 0.27               |
| How confident do you feel about advising an HIV-infected mother who is virally suppressed who is mixed feeding her infant                                | 243 (84.1)                     | 113 (86.3)                     | 0.57               | 226 (89.7)                     | 99 (86.8)                      | 0.43               |
| How confident do you feel about advising an HIV-positive mother about starting complementary feeds                                                       | 251 (86.9)                     | 115 (87.8)                     | 0.79               | 229 (90.9)                     | 103 (90.4)                     | 0.87               |
| How confident do you feel about explaining the risks of HIV transmission through breastmilk to an HIV-infected mother with high viral load               | 247 (85.5)                     | 114 (87.0)                     | 0.67               | 220 (87.3)                     | 105 (92.1)                     | 0.17               |
| How confident do you feel about explaining to a mother about expressing and storing milk                                                                 | 269 (93.1)                     | 124 (94.7)                     | 0.54               | 237 (94.1)                     | 109 (95.6)                     | 0.54               |
| <b><u>Number (%) participants who were confident or very confident (Sum Score ≥ 57)</u></b>                                                              | <b><u>164 (56.8)</u></b>       | <b><u>86 (67.2)</u></b>        | <b><u>0.09</u></b> | <b><u>175 (70.0)</u></b>       | <b><u>72 (64.3)</u></b>        | <b><u>0.28</u></b> |
| <b><u>Mean confidence score out of 76 (95% CI)</u></b>                                                                                                   | <b><u>59.1 (58.0-60.2)</u></b> | <b><u>59.1 (57.0-61.3)</u></b> | <b><u>1.0</u></b>  | <b><u>61.2 (60.8-63.1)</u></b> | <b><u>59.9 (58.1-61.7)</u></b> | <b><u>0.05</u></b> |
